# Supplementary material for: Hydrogen-bonded cobalt(ii)-organic framework: normal and reverse spin-crossover behaviours
Source: Royal Society of Chemistry journal article supplement (doi:10.1039/d2dt00453d), 2022-01-01
Supplement: d2dt00453d1.pdf [file d2dt00453d1.pdf]

## **Electronic Supplementary Information**

### **Hydrogen-Bonded Cobalt(II)-Organic Framework: Normal and Reverse Spin-Crossover Behaviours**

Takuya Kanetomo, Zhen Ni, and Masaya Enomoto

Tokyo University of Science, 1-3 Kagurazaka, Shinjuku-ku, Tokyo 162-8601, Japan

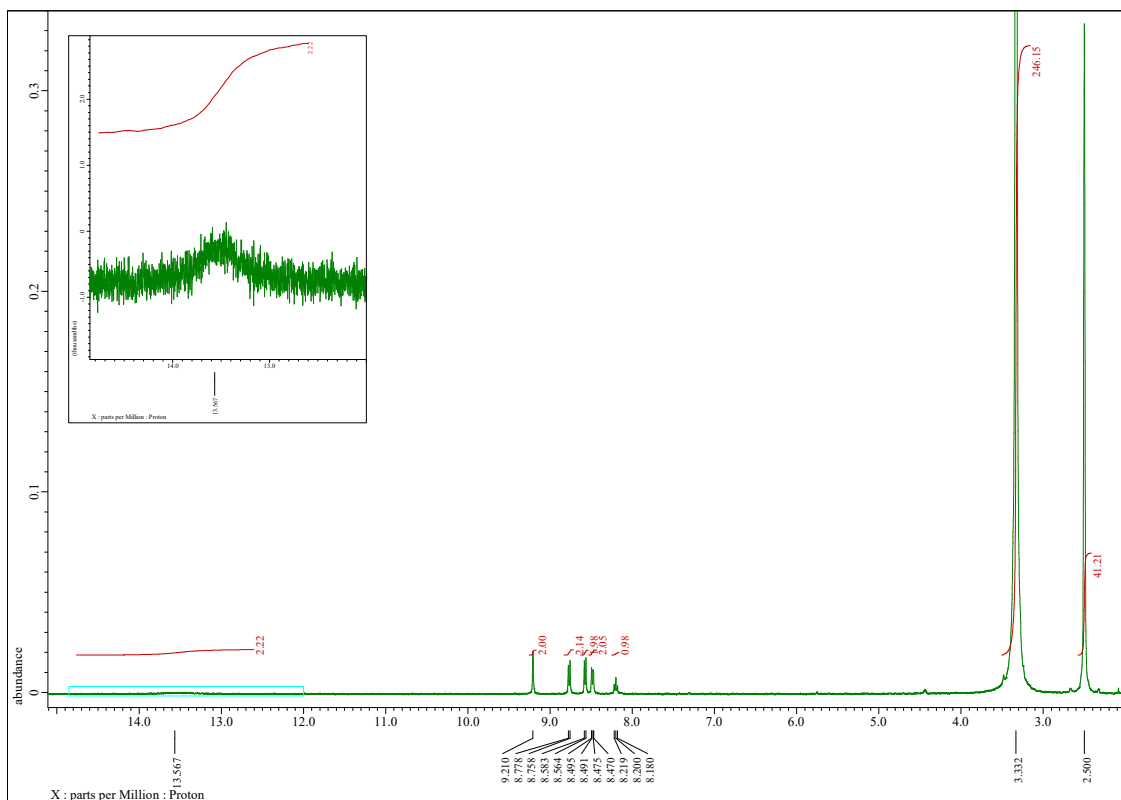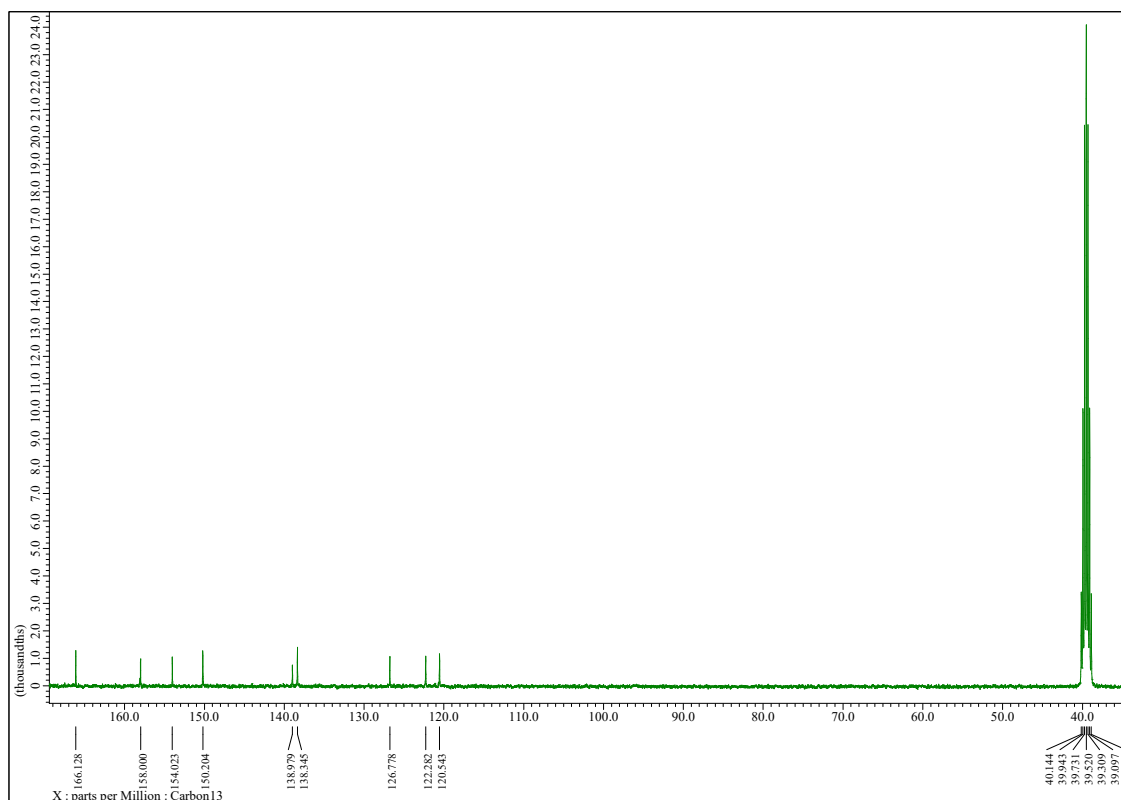

Fig. S1. <sup>1</sup>H NMR spectrum of H<sub>2</sub>L.

**Fig. S2.**  $^{13}\text{C}$  NMR spectrum of  $\text{H}_2\text{L}$ .

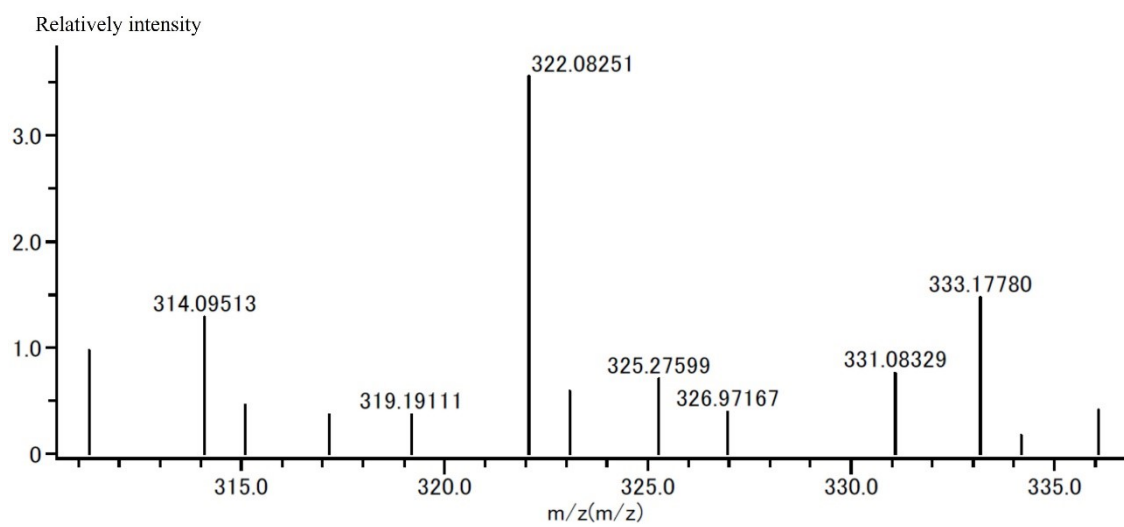

**Fig. S3.** HRMS spectrum of  $\text{H}_2\text{L}$ .
